# Supplementary material for: OTULIN Antagonizes LUBAC Signaling by Specifically Hydrolyzing Met1-Linked Polyubiquitin
Source: PubMed Central journal article supplement (PMC3690481; doi:10.1016/j.cell.2013.05.014), 2013-06-06
Supplement: mmc1.pdf [file mmc1.pdf]

**Table S1. Data Collection and Refinement Statistics**

|                                                               | OTULIN<br>80-352<br>SeMet | OTULIN<br>80-352         | OTULIN<br>80-352<br>D336A | OTULIN<br>80-352<br>C129A<br>•Met1-diUb |
|---------------------------------------------------------------|---------------------------|--------------------------|---------------------------|-----------------------------------------|
| <b>Data collection</b>                                        |                           |                          |                           |                                         |
| Beamline                                                      | ESRF<br>ID23-1            | ESRF<br>ID23-1           | ESRF<br>ID14-4            | Diamond I04                             |
| Space group                                                   | $P2_12_12_1$              | $P2_12_12_1$             | $P2_12_12_1$              | $H3_2$                                  |
| $a, b, c$ (Å)                                                 | 43.59, 72.44,<br>95.19    | 43.49, 72.01,<br>94.67   | 43.81, 72.20,<br>94.84    | 100.02, 100.02,<br>280.26               |
| $\alpha, \beta, \gamma$ (°)                                   | 90, 90, 90                | 90, 90, 90               | 90, 90, 90                | 90, 90, 120                             |
| Wavelength                                                    | 0.9794<br>(Peak)          | 0.9794                   | 0.9762                    | 0.9795                                  |
| Resolution (Å)                                                | 57.65-2.9<br>(3.06-2.90)  | 39.5-1.30<br>(1.32-1.30) | 47.42-1.35<br>(1.37-1.35) | 42.80-1.90<br>(2.00-1.90)               |
| $R_{\text{merge}}$                                            | 0.151 (0.311)             | 0.113 (0.326)            | 0.094 (0.705)             | 0.094 (0.778)                           |
| $I / \sigma I$                                                | 14.8 (8.1)                | 7.3 (3.3)                | 9.9 (2.4)                 | 14.4 (3.0)                              |
| Completeness (%)                                              | 100 (100)                 | 99.8 (99.4)              | 100 (100)                 | 100 (100)                               |
| Redundancy                                                    | 13.7 (13.5)               | 3.9 (3.9)                | 6.1 (4.7)                 | 8.9 (9.1)                               |
| <b>Phasing</b>                                                |                           |                          |                           |                                         |
| Resolution (Å)                                                | 57.65-2.90<br>(3.06-2.90) |                          |                           |                                         |
| Anomalous completeness                                        | 100 (100)                 |                          |                           |                                         |
| Anomalous multiplicity                                        | 7.5 (7.2)                 |                          |                           |                                         |
| <FOM>                                                         | 0.18                      |                          |                           |                                         |
| <FOM> <sub>DM</sub> extended to 2.23 Å                        | 0.91                      |                          |                           |                                         |
| <b>Refinement</b>                                             |                           |                          |                           |                                         |
| Resolution (Å)                                                |                           | 33.58-1.30               | 47.42-1.35                | 42.80-1.90                              |
| No. reflections                                               |                           | 69951                    | 66797                     | 42965                                   |
| $R_{\text{work}} / R_{\text{free}}$                           |                           | 12.6/15.3                | 12.3/15.8                 | 18.4/22.0                               |
| No. atoms                                                     |                           |                          |                           |                                         |
| Protein                                                       |                           | 2345                     | 2337                      | 3349                                    |
| Ligand/ion                                                    |                           | 20                       | 20                        | 35                                      |
| Water                                                         |                           | 301                      | 319                       | 371                                     |
| <i>B</i> -factors                                             |                           |                          |                           |                                         |
| Wilson <i>B</i>                                               |                           | 16.2                     | 18.0                      | 27.4                                    |
| Protein                                                       |                           | 15.4                     | 18.2                      | 31.4                                    |
| Ligand/ion                                                    |                           | 25.2                     | 33.5                      | 55.9                                    |
| Water                                                         |                           | 27.1                     | 31.5                      | 39.1                                    |
| R.m.s deviations                                              |                           |                          |                           |                                         |
| Bond lengths (Å)                                              |                           | 0.023                    | 0.022                     | 0.007                                   |
| Bond angles (°)                                               |                           | 1.712                    | 1.785                     | 1.020                                   |
| Ramachandran statistics<br>(favoured / allowed /<br>outliers) |                           | 97.6/ 2.4 / 0            | 97 / 3 / 0                | 97.6 / 2.4 / 0                          |

Numbers in brackets are for the highest resolution bin.
